# Supplementary figures and images for: Persistent reduction of retinal microvascular vessel density in patients with moderate and severe COVID-19 disease
Source: HighWire-hosted journal article supplement (doi:10.1136/bmjophth-2021-000867), 2022-01-01

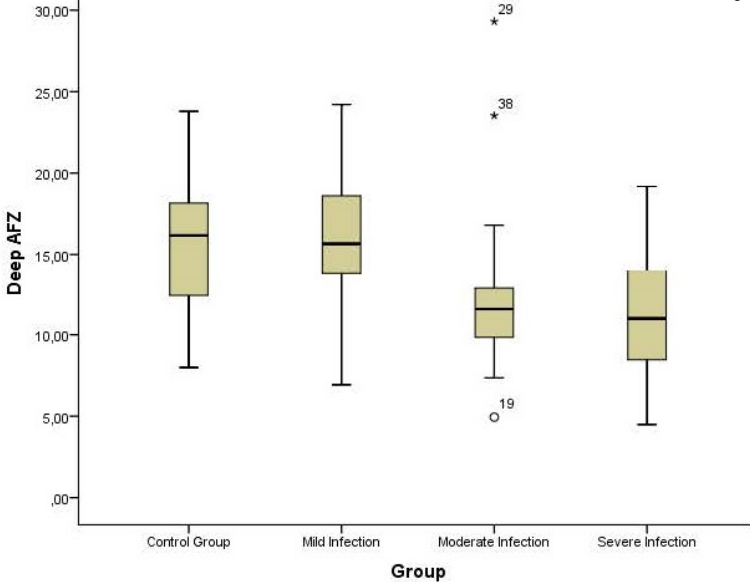

Supplement: bmjophth-2021-000867supp003_data_supplement.pdf [file bmjophth-2021-000867supp003_data_supplement.pdf]
